# Supplementary material for: In Vivo Messenger RNA Introduction into the Central Nervous System Using Polyplex Nanomicelle
Source: PubMed Central journal article supplement (PMC3571986; doi:10.1371/journal.pone.0056220), 2013-02-13
Supplement: pone.0056220.s001.pdf [file pone.0056220.s001.pdf]

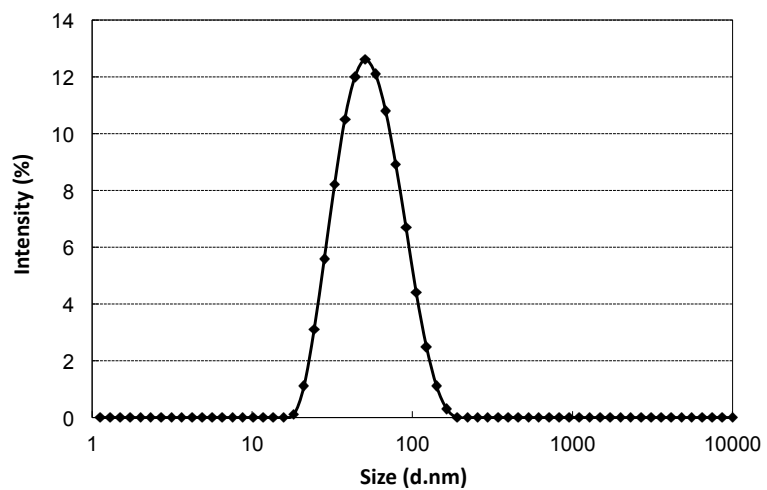

**Figure S1** Size distribution of polyplex nanomicelle determined by dynamic light scattering (DLS).
