# Supplementary material for: In Vivo Messenger RNA Introduction into the Central Nervous System Using Polyplex Nanomicelle
Source: PubMed Central journal article supplement (PMC3571986; doi:10.1371/journal.pone.0056220), 2013-02-13
Supplement: pone.0056220.s002.pdf [file pone.0056220.s002.pdf]

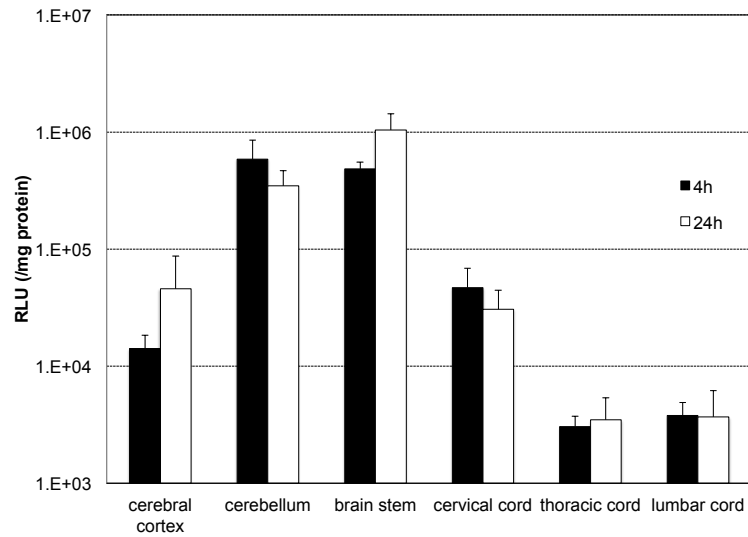

**Figure S2 Tissue distribution of luciferase expression after polyplex nanomicelle administration.**

Luciferase was extracted from the central nervous system (CNS) of mice at 4 h (closed bar) and 24 h (open bar) after the administration. The data are presented as the mean  $\pm$  standard error of the mean (s.e.m.) (N = 6). RLU, relative luminescence units.
