# Supplementary material for: In Vivo Messenger RNA Introduction into the Central Nervous System Using Polyplex Nanomicelle
Source: PubMed Central journal article supplement (PMC3571986; doi:10.1371/journal.pone.0056220), 2013-02-13
Supplement: pone.0056220.s003.pdf [file pone.0056220.s003.pdf]

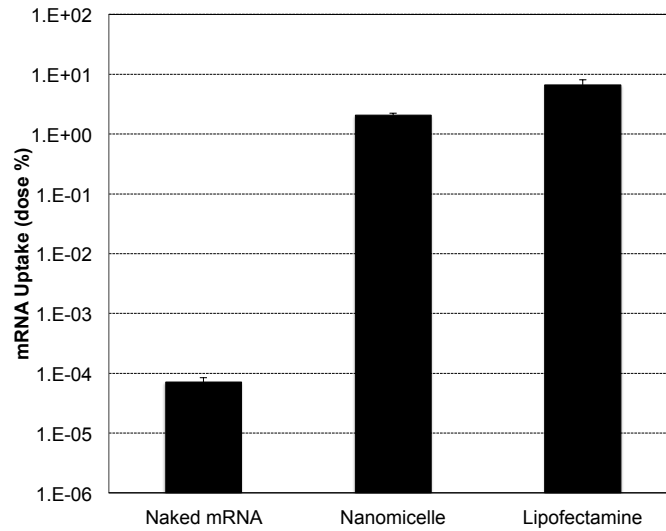

**Figure S3 Cellular uptake of messenger RNA (mRNA) after *in vitro* delivery.**

HEK293 cells expressing Toll-like receptor (TLR)7 were treated with naked mRNA, polyplex nanomicelle and lipofectamine 2000-based carrier from unmodified mRNA. The amount of mRNA uptake was quantified at 4 h after the treatment using real-time quantitative PCR (RT-PCR). The data are presented as the mean  $\pm$  standard error of the mean (s.e.m.) (N = 6).
